# Supplementary material
Source: Springer Nature journal article supplement (https://www.springermedizin.de/resource/supplementary/12885_2012_3269_MOESM2_ESM.pdf/9463298)

**a**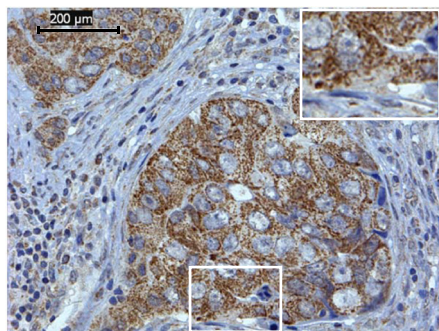**SLC25A43**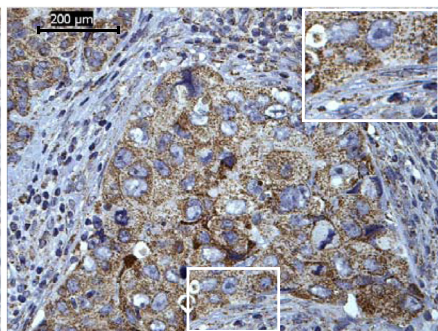**ATP5B****b**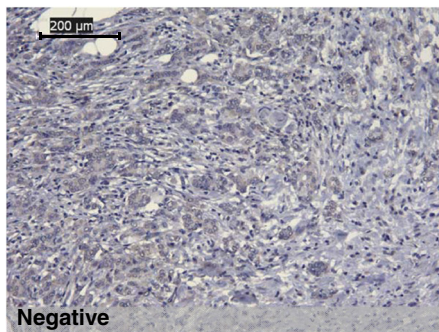**Negative**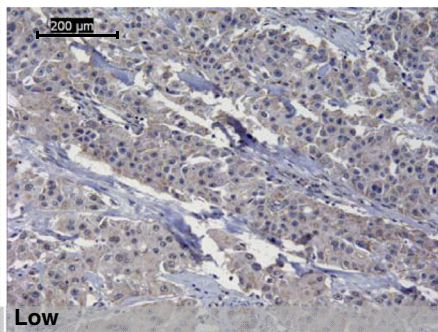**Low**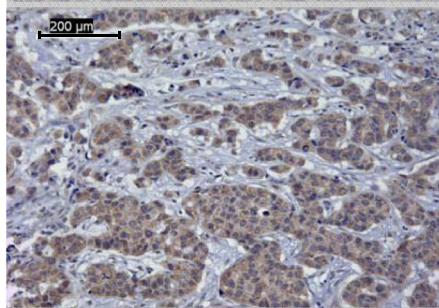**Medium**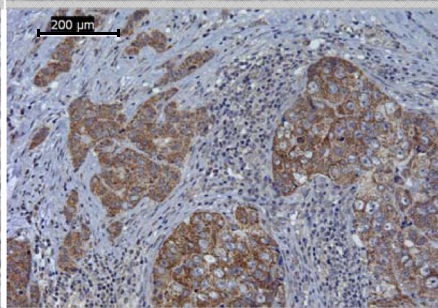**High**

Supplement: MOESM2 [file 9463298]
